# Supplementary material for: Modeling the transformation of atmospheric CO2into microalgal biomass
Source: Royal Society of Chemistry journal article supplement (doi:10.1039/c7an01054k), 2017-01-01
Supplement: c7an01054k1.pdf [file c7an01054k1.pdf]

### Derivation of Source Function $S(x,t)$ :

The source function  $S(x,t)$  quantitatively describes how the microalgae's source of inorganic C, i.e.  $HCO_3^-$ , is formed from atmospheric  $CO_{2(g)}$ . In a first step, Henry's law describes a thermodynamic equilibrium between gas and aqueous phase and thus determines the quantity of  $CO_2$  that dissolves into seawater ( $CO_{2(g)} \rightarrow CO_{2(aq)}$ ). From  $CO_{2(aq)}$ , carbonic acid ( $H_2CO_3$ ) forms which partially dissociates in water resulting in bicarbonate ( $HCO_3^-$ ) which in turn produces a small quantity of carbonate ions ( $CO_3^{2-}$ ) (1). As will be discussed in the remainder, the most relevant product formed in this sequence of reactions is  $HCO_3^-$ .

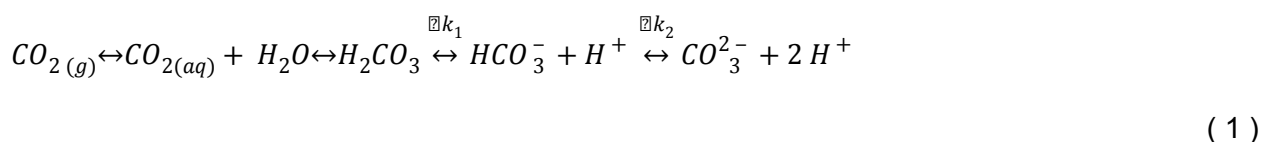

Quantitating the transformation of  $CO_{2(g)}$  into  $HCO_3^-$  requires a detailed analysis. First, the partial pressure of  $CO_2$  in the atmosphere (in atm) needs to be determined:

$$pCO_2 = xCO_2 \cdot (P - pH_2O) \cdot 10^{-6} \quad (2)$$

In (2),  $xCO_2$  represents is the mole fraction of  $CO_2$  in the atmosphere and  $P$  the total atmospheric pressure in atm (used here: 1atm). Since,  $CO_2$  exchange occurs at the air-water interface, saturation vapor pressure of water,  $pH_2O$  (atm) needs to be subtracted from the total pressure. Saturation water vapor pressure can be calculated by 1:

$$\ln(pH_2O) = 24.4543 - \frac{6745.09}{T} - 4.8489 \cdot \ln\left(\frac{T}{100}\right) - 0.00054 \cdot S \quad (3)$$

In (3),  $T$  represents the temperature of the air-water interface in Kelvin and  $S$  denotes the seawater salinity in g/kg. Since,  $CO_2$  is not an ideal gas, its fugacity  $fCO_2$  (in atm) needs to be calculated from its partial pressure and ideal gas constant  $R$  2:

$$fCO_2 = pCO_2 \cdot \exp\left(P \cdot \frac{B + 2\delta}{R \cdot T}\right) \quad (4)$$

For calculating  $f^{CO_2}$  (4),  $B$  and  $\delta$  (both in  $m^3 \cdot mol^{-1}$ ) are required which denote the virial coefficient and the cross-virial coefficient, respectively <sup>3</sup>:

$$B = (-1636.75 + 12.0408 \cdot T - 3.27957 \cdot 10^{-2} \cdot T^2 + 3.16528 \cdot 10^{-5} \cdot T^3) \cdot 10^{-6}$$

$$\delta = (57.7 - 0.118 \cdot T) \cdot 10^{-6}$$

After calculating fugacity, the  $CO_2$  concentration (mol/kg) dissolved in seawater can be calculated from  $[CO_2] = K_0 \cdot f^{CO_2}$  with  $K_0$  (mol/kg-atm) denoting  $CO_2$  solubility coefficient which has been determined in <sup>3</sup> as:

$$K_0 = 10^{-6} \cdot \exp\left\{\frac{9345.17}{T} - 60.2409 + 23.3585 \cdot \ln\left(\frac{T}{100}\right) + S \cdot (0.023\right.$$

Dissolved  $CO_{2(aq)}$  is in equilibrium with  $HCO_3^-$  and  $CO_3^{2-}$  according to:

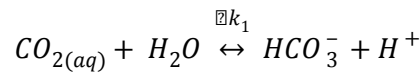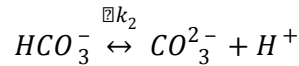

The equilibrium constants  $k_1 = \frac{[HCO_3^-] \cdot [H^+]}{[CO_2]}$  and  $k_2 = \frac{[CO_3^{2-}] \cdot [H^+]}{[HCO_3^-]}$  are temperature

$T$  ( $= 296K$ ) and salinity  $S = 35 \frac{g \text{ salt}}{kg \text{ seawater}}$  dependent functions (in mol/kg) and have been determined in <sup>4</sup> as:

$$\ln(k_1) = 2.83655 - \frac{2307.1266}{T} - 1.5529413 \cdot \ln(T) - \left(0.207608410 + \frac{4.048}{T}\right)$$

$$\ln(1 - 0.001005 \cdot S)$$

$$\ln(k_2) = -9.226508 - \frac{3351.6106}{T} - 0.2005743 \cdot \ln(T) - \left(0.1069018 + \frac{23.97}{T}\right)$$

$$\ln(1 - 0.001005 \cdot S)$$

$[H^+]$  (in mol/kg) can be determined from the  $pH$  ( $= 8.20$ ; *buffered*) and density of the seawater

solution  $\left(= 1.026 \frac{kg}{L}\right)$ . With  $[CO_2]$ ,  $[H^+]$ , and  $k_1$  known,  $[HCO_3^-]$  (in mol/kg) can be calculated:

$$[HCO_3^-] = \frac{k_1 \cdot [CO_2]}{[H^+]}$$

For completeness purposes, the carbonate ion concentration can be determined, too:

$$[CO_3^{2-}] = \frac{k_2 \cdot [HCO_3^-]}{[H^+]}$$

Finally, gravimetric concentration units (mol/kg) are converted to millimolar (mM) through the density of seawater (kg/L) for this modeling application.

## References:

1. R. F. Weiss and B. A. Price, *Marine Chemistry*, 1980, **8**, 347-359.
2. A. Kortzinger, L. Mintrop and J. C. Duinker, *Journal of Geophysical Research*, 1998, **103**, 9.
3. R. F. Weiss, *Marine Chemistry*, 1974, **2**, 203-215.
4. R. N. Roy, L. N. Roy, K. M. Vogel, C. Porter-Moore, T. Pearson, C. E. Good, F. J. Millero and D. M. Campbell, *Marine Chemistry*, 1993, **44**, 249-267.
